# Supplementary material for: Mechanical and thermal properties of carbon nanotubes in carbon nanotube fibers under tension–torsion loading
Source: Royal Society of Chemistry journal article supplement (doi:10.1039/d2ra05360h), 2022-01-01
Supplement: d2ra05360h1.pdf [file d2ra05360h1.pdf]

## Supporting Information

# Mechanical and thermal properties of carbon nanotubes in carbon nanotube fibers under tension-torsion loading

Mowen Niu<sup>a,e</sup>, Chongxiao Cui<sup>a,b</sup>, Rui Tian<sup>a</sup>, Yushun Zhao<sup>a,b,d,\*</sup>, Linlin Miao<sup>a,b</sup>,  
Weizhe Hao<sup>a,b</sup>, Jiaxuan Li<sup>a,b</sup>, Chao Sui<sup>a,b,d,\*</sup>, Xiaodong He<sup>b,c,d</sup>, Chao Wang<sup>a,b,d,\*</sup>

<sup>a</sup>School of Astronautics, Harbin Institute of Technology, Harbin 150080, China

<sup>b</sup>Center for Composite Materials and Structures, Harbin Institute of Technology, Harbin 150080, China

<sup>c</sup>Shenzhen STRONG Advanced Materials Research Institute Co., Ltd, Shenzhen 518000, China

<sup>d</sup>National Key Laboratory of Science and Technology on Advanced Composites in Special Environments, Harbin Institute of Technology, Harbin 150080, P. R. China

<sup>e</sup>Beijing Institute of Astronautical Systems Engineering, Beijing 100076, China

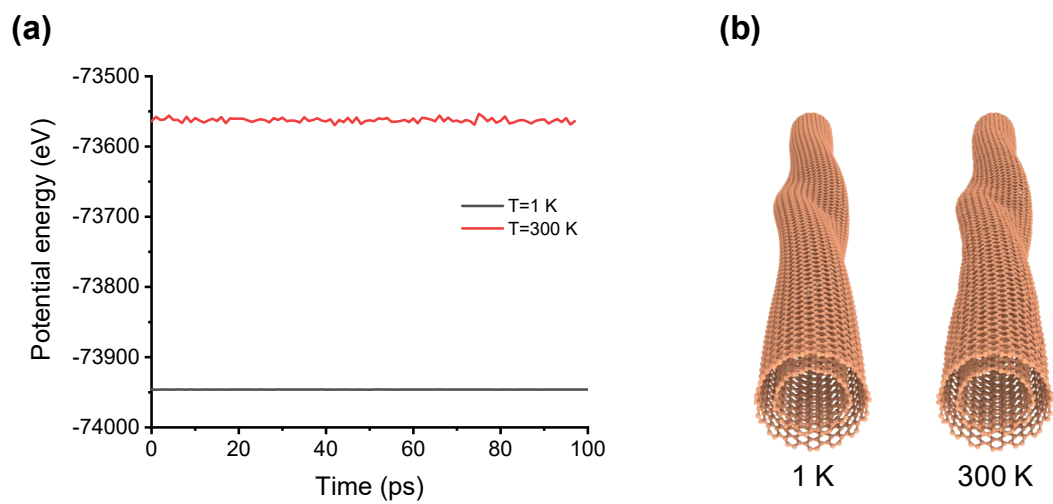

Figure S1 (a) Potential energy of representative DWCNT with  $\alpha=0.25^\circ/\text{\AA}$  during relaxation process; (b) Snapshots of fully relaxed DWCNT under temperature 1 K and 300 K.

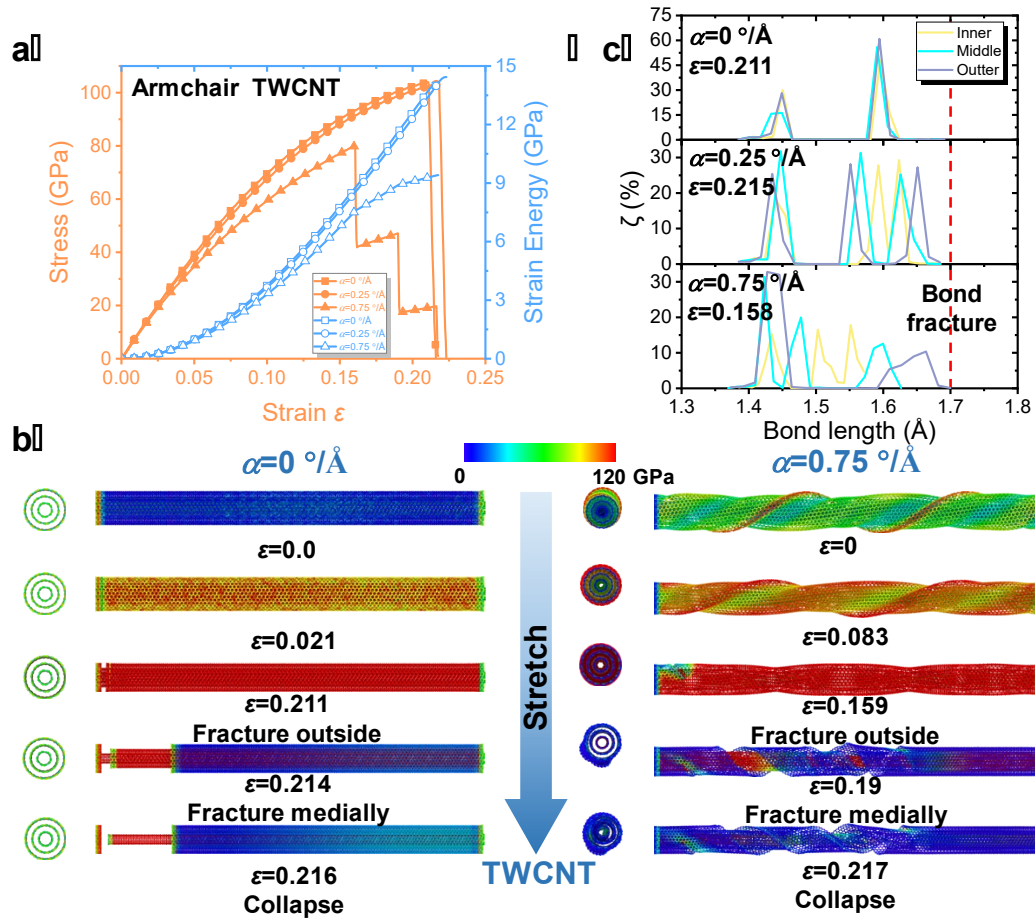

**Figure S2.** (a) Stress and strain energy versus strain curves of TWCNT; (b) Snapshot of tensile process of TWCNT under  $\alpha=0^\circ/\text{\AA}$  and  $\alpha=0.75^\circ/\text{\AA}$ , atoms are colored by von mises stress; (c) The corresponding diagram of different bond length distribution of TWCNT in (a).
